# Supplementary material for: Investigation of Elimination Rate, Persistent Subpopulation Removal, and Relapse Rates of Mycobacterium tuberculosis by Using Combinations of First-Line Drugs in a Modified Cornell Mouse Model
Source: PubMed Central journal article supplement (PMC4958161; doi:10.1128/aac.02548-15), 2016-07-22
Supplement: AAC.02548-15_zac008165395so1.pdf [file AAC.02548-15_zac008165395so1.pdf]

Table S1. Pairwise comparisons of differences between elimination rate constants during therapy in mouse lungs

| Treatment               | diff. $k_{net\_with\_drug}$ |      |              |                           |
|-------------------------|-----------------------------|------|--------------|---------------------------|
|                         | est.                        | se.  | p-value      |                           |
| RMP vs. RMP-INH         | 0.32                        | 0.02 | $P < 0.0001$ | significant difference    |
| RMP vs. RMP-PZA         | 0.3                         | 0.02 | $P < 0.0001$ | significant difference    |
| RMP vs. INH-PZA         | 0.2                         | 0.02 | $P < 0.0001$ | significant difference    |
| RMP vs. RMP-INH-PZA     | 0.29                        | 0.02 | $P < 0.0001$ | significant difference    |
| INH vs. RMP-INH         | 0.26                        | 0.03 | $P < 0.0001$ | significant difference    |
| INH vs. INH-PZA         | 0.15                        | 0.03 | $P < 0.0001$ | significant difference    |
| INH vs. RMP-PZA         | 0.25                        | 0.03 | $P < 0.0001$ | significant difference    |
| INH vs. RMP-INH-PZA     | 0.24                        | 0.03 | $P < 0.0001$ | significant difference    |
| PZA vs. RMP-PZA         | 0.26                        | 0.02 | $P < 0.0001$ | significant difference    |
| PZA vs. INH-PZA         | 0.16                        | 0.03 | $P < 0.0001$ | significant difference    |
| PZA vs. RMP-INH         | 0.28                        | 0.03 | $P < 0.0001$ | significant difference    |
| PZA vs. RMP-INH-PZA     | 0.25                        | 0.03 | $P < 0.0001$ | significant difference    |
| RMP vs. INH             | 0.06                        | 0.03 | $P > 0.002$  | no significant difference |
| RMP vs. PZA             | 0.04                        | 0.03 | $P > 0.002$  | no significant difference |
| PZA vs. INH             | 0.01                        | 0.04 | $P > 0.002$  | no significant difference |
| RMP-INH vs. RMP-PZA     | 0.02                        | 0.02 | $P > 0.002$  | no significant difference |
| RMP-INH vs. INH-PZA     | 0.12                        | 0.02 | $P < 0.0001$ | significant difference    |
| RMP-INH vs. RMP-INH-PZA | 0.02                        | 0.02 | $P > 0.002$  | no significant difference |
| RMP-PZA vs. INH-PZA     | 0.1                         | 0.02 | $P < 0.0001$ | significant difference    |
| RMP-PZA vs. RMP-INH-PZA | 0.01                        | 0.02 | $P > 0.002$  | no significant difference |
| INH-PZA vs. RMP-INH-PZA | 0.09                        | 0.02 | $P < 0.0001$ | significant difference    |

Table S2. Pairwise comparisons of differences between spleen elimination rate constants during therapy in muse spleens

| Treatment           | diff. $k_{net\_with\_drug}$ |      |              |                           |
|---------------------|-----------------------------|------|--------------|---------------------------|
|                     | est.                        | se.  | p-value      |                           |
| RMP vs. RMP-INH     | 0.21                        | 0.02 | $P < 0.0001$ | significant difference    |
| RMP vs. RMP-PZA     | 0.12                        | 0.03 | $P < 0.0001$ | significant difference    |
| RMP vs. INH-PZA     | 0.13                        | 0.03 | $P < 0.0001$ | significant difference    |
| RMP vs. RMP-INH-PZA | 0.17                        | 0.02 | $P < 0.0001$ | significant difference    |
| INH vs. RMP-INH     | 0.23                        | 0.02 | $P < 0.0001$ | significant difference    |
| INH vs. INH-PZA     | 0.15                        | 0.03 | $P < 0.0001$ | significant difference    |
| INH vs. RMP-PZA     | 0.14                        | 0.03 | $P < 0.0001$ | significant difference    |
| INH vs. RMP-INH-PZA | 0.19                        | 0.02 | $P < 0.0001$ | significant difference    |
| PZA vs. RMP-PZA     | 0.17                        | 0.03 | $P < 0.0001$ | significant difference    |
| PZA vs. INH-PZA     | 0.18                        | 0.02 | $P < 0.0001$ | significant difference    |
| PZA vs. RMP-INH     | 0.26                        | 0.02 | $P < 0.0001$ | significant difference    |
| PZA vs. RMP-INH-PZA | 0.22                        | 0.02 | $P < 0.0001$ | significant difference    |
| RMP vs. INH         | -0.02                       | 0.03 | $P > 0.05$   | no significant difference |
| RMP vs. PZA         | -0.05                       | 0.02 | $P > 0.05$   | no significant difference |
| PZA vs. INH         | 0.03                        | 0.02 | $P > 0.05$   | no significant difference |
| RMP-INH vs. RMP-PZA | -0.09                       | 0.02 | $P > 0.04$   | no significant difference |

|                         |       |      |          |                           |
|-------------------------|-------|------|----------|---------------------------|
| RMP-INH vs. INH-PZA     | -0.08 | 0.02 | P > 0.04 | no significant difference |
| RMP-INH vs. RMP-INH-PZA | -0.04 | 0.02 | P > 0.05 | no significant difference |
| RMP-PZA vs. INH-PZA     | -0.01 | 0.03 | P > 0.05 | no significant difference |
| RMP-PZA vs. RMP-INH-PZA | -0.05 | 0.03 | P > 0.05 | no significant difference |
| INH-PZA vs. RMP-INH-PZA | 0.04  | 0.02 | P > 0.05 | no significant difference |

---
